# Supplementary material for: Advances and Challenges in Biomarkers Use for Coronary Microvascular Dysfunction: From Bench to Clinical Practice
Source: MDPI journal article supplement (doi:10.3390/jcm11072055), 2022-04-06
Supplement: s1 [file s1]

**Supplementary Table S1.** Biomarkers in coronary microvascular dysfunction.

| Candidate biomarker                | Biological class                                                            | Site of production                                                                             | Cardiovascular function                                                                                                                   | Clinical implication and use                                                                                                     | References  |
|------------------------------------|-----------------------------------------------------------------------------|------------------------------------------------------------------------------------------------|-------------------------------------------------------------------------------------------------------------------------------------------|----------------------------------------------------------------------------------------------------------------------------------|-------------|
| Cardiac troponins (T and I)        | Cardiac enzymes                                                             | Cardiomyocytes                                                                                 | To hold the actin-tropomyosin complex in place                                                                                            | Main diagnostic biomarker of myocardial infarction and injury.<br>Uncertain correlation with IMR, CFR and CMD.                   | [25-33]     |
| Natriuretic peptides (ANP and BNP) | Protein neuro-hormones                                                      | Ventricular and atrial cardiomyocytes                                                          | Vascular tone regulation, diuresis and natriuresis, antagonism of the renin-angiotensin system                                            | Diagnostic and prognostic marker of HF.<br>Uncertain correlation with CMD and myocardial BFR.                                    | [34-39]     |
| Myeloperoxidase (MPO)              | Protein enzyme                                                              | Polymorphonuclear neutrophils (PMNs)                                                           | Generation of oxygen- and nitrogen-derived reactive species promoting oxidative damage of pathogens                                       | Indirect reduction of nitric oxide (NO) bioavailability leading to CMD.<br>Predictor of cardiotoxicity from cancer drugs.        | [49-57]     |
| Asymmetric dimethylarginine (ADMA) | Methylation product of amino acid arginine                                  | Probably intracellular, ubiquitously, with extracellular deposition mainly in kidney and liver | Endogenous inhibitor of endothelial nitric oxide synthase (eNOS), reducing NO bioavailability<br>Increased leukocyte and PMN activation   | Independent risk factor for long-term adverse cardiovascular events.<br>Indirect reduction of NO bioavailability leading to CMD. | [53-57]     |
| Symmetric dimethylarginine (SDMA)  | Alternative methylation product of amino acid arginine (enantiomer of ADMA) | Probably intracellular, ubiquitously, with extracellular deposition mainly in kidney and liver | Still not clear<br>It lacks eNOS inhibitory activity                                                                                      | Higher levels of predict coronary artery disease and long-term MACEs.<br>Correlation with diastolic dysfunction.                 | [53-57]     |
| C-reactive protein (CRP)           | Annular pentameric protein                                                  | Liver and adipose tissue                                                                       | Acute-phase protein that binds to lysophosphatidylcholine on the surface of dead or dying cells to activate the complement system via C1q | Independent predictor of MACEs in CAD.<br>Uncertain role in predicting CMD.                                                      | [40, 58-62] |
| ICAM-1<br>VCAM-1                   | Transmembrane glycoprotein receptor                                         | Ubiquitously in vascular endothelial cells                                                     | Leukocyte-endothelial interaction and rolling                                                                                             | Positive correlation with CMD.                                                                                                   | [63-71]     |

|                     |                                                      |                                                                                                         |                                                                                                                                         |                                                                                                    |           |
|---------------------|------------------------------------------------------|---------------------------------------------------------------------------------------------------------|-----------------------------------------------------------------------------------------------------------------------------------------|----------------------------------------------------------------------------------------------------|-----------|
| E- selectin         | Transmembrane glycoprotein receptor                  | Ubiquitously in vascular endothelial cells                                                              | Leukocyte activation, firm adhesion and transendothelial migration                                                                      | Positive correlation with CMD                                                                      | [64-65]   |
| Neuregulin-1 (NRG1) | Peptide of the epidermal growth factor (EGFR) family | Vascular endothelial cells, mainly of the nervous and cardiovascular systems                            | Development and maintenance of the cardiovascular system                                                                                | Expression upregulated with progression of heart failure (HF)<br>Decreased levels in end-staged HF | [72-94]   |
| Renalase            | Flavin adenine dinucleotide-dependent amine oxidase  | Renal proximal tubules, cardiomyocytes, liver, pancreas, skeletal muscle and reproductive system        | Anti-oxidative, anti-inflammatory, anti-apoptotic role                                                                                  | Positive correlation with CMD                                                                      | [95-106]  |
| Serotonin (5-HT)    | Product of amino acid tryptophan                     | Serotonergic neurons of central nervous system and enterochromaffin cells of the gastrointestinal tract | Platelet aggregation, vasodilation and vasoconstriction, proliferation and migration of vascular smooth muscle cells, atherogenic role. | Positive correlation with CMD                                                                      | [107-121] |
